# Supplementary material
Source: PubMed Central journal article supplement (PMC4510867)
Supplement: supp_dev.124024_DEV124024supp.pdf [file supp_dev.124024_DEV124024supp.pdf]

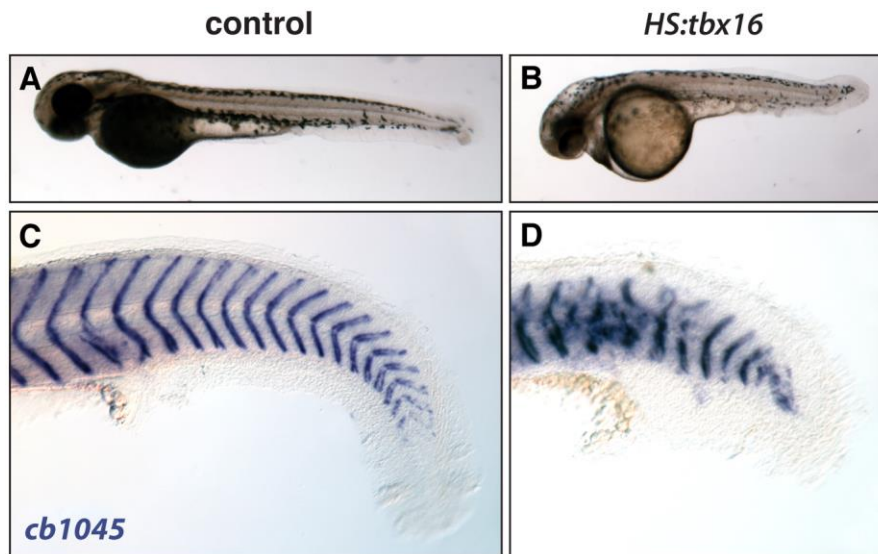

**Figure S1. Ubiquitous *tbx16* expression causes organism-wide defects.**

At 36 hpf, bright field images show that control siblings (A) are longer than embryos with the *HS:tbx16* transgene (B) after heat shock. In situ hybridization with *cb1045*, a probe that normally marks the somite boundaries in control siblings (C), shows severe disruptions in somite formation in *HS:tbx16* embryo (D). The left-most somite shown in C is the 14<sup>th</sup> somite and the left-most somite shown in D is the 13<sup>th</sup> somite. All embryos were heat shocked at the 12 ss.

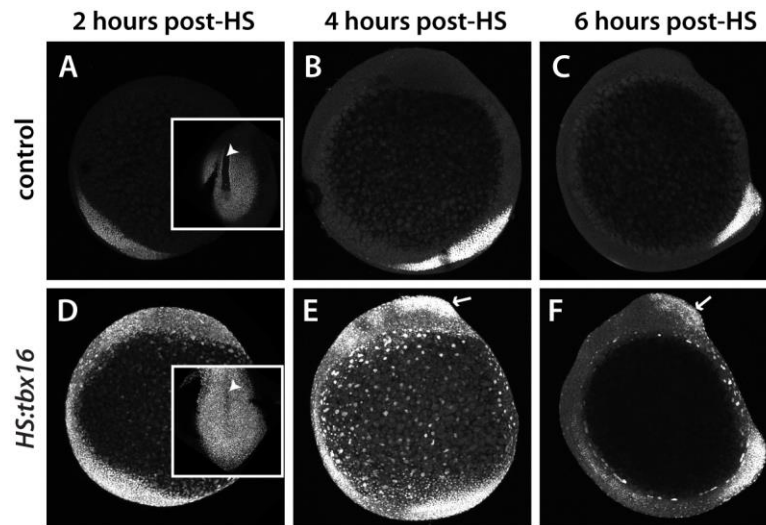

**Figure S2. Ectopic Tbx16 is ubiquitous, labile and peaks at 4 hours post-heat shock.**

In control (A-C) and *HS:tbx16* (D-F) embryos, immunofluorescence shows that Tbx16 protein levels have increased by 2 hours post-heat shock (A, D) with a peak at 4 hours post-heat shock (B, E), and that levels of Tbx16 have largely returned to normal by 6 hours post-heat shock (C, F). Inset in D shows ectopic Tbx16 in the notochord and neural tube (marked by arrowheads) when compared to the control inset in A (both dorsal views of the tailbud); arrows in E, F highlight the telencephalon, which retains ectopic Tbx16.

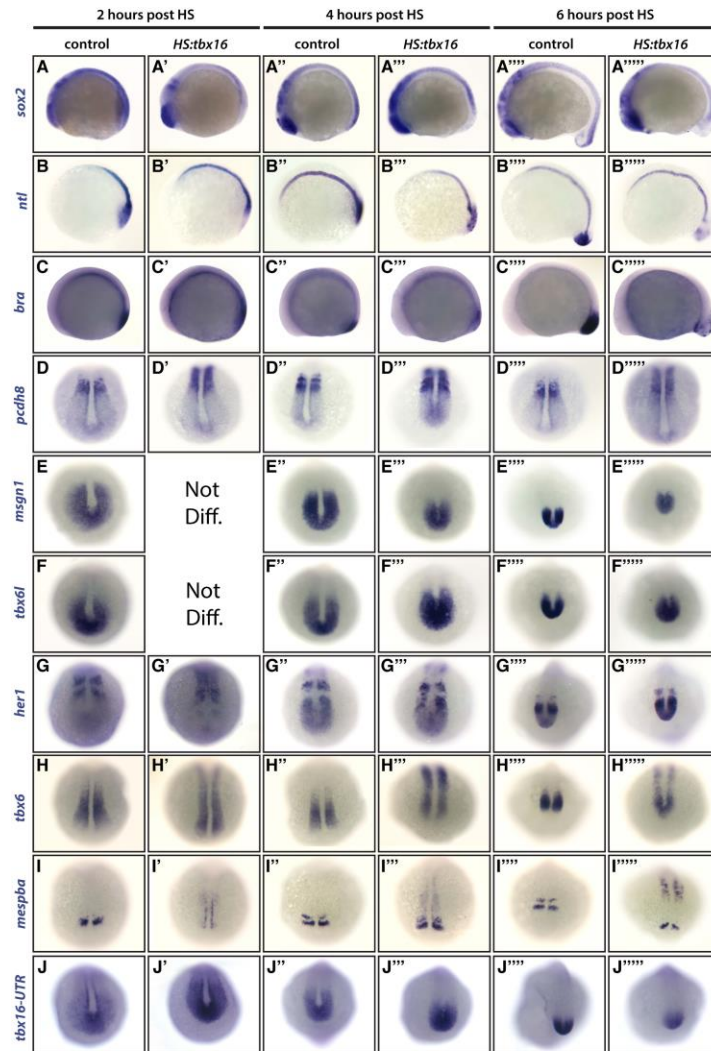

**Figure S3. Gene expression after heat shock activation of *HS:tbx16*.**

Whole mount in situ hybridization data used for the summary of changes to genes after the expression of ectopic *tbx16* (shown in Figure 2A). Because of the large number of embryos screened for this analysis, transgenic embryos were not separated from their nontransgenic siblings prior to in situ hybridization. A minimum of 30 embryos was used for each condition. In all cases except where noted as Not Diff. (not different), approximately 50% of the embryos matched previously published wild-type expression patterns and 50% showed the altered pattern. See Table S1 for quantification of the results.

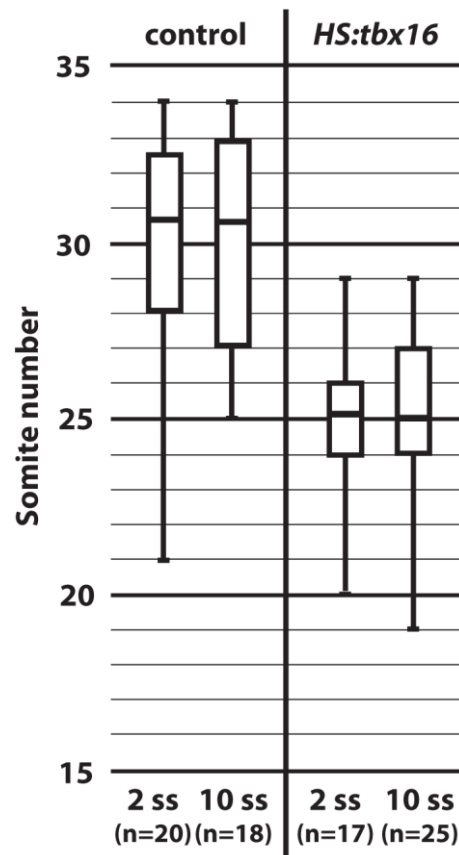

**Figure S4. The timing of heat shock does not determine the timing of the cell exit driven by *HS:tbx16*.**

Quantification of the most posterior somite in a 36 hpf embryo occupied by a fluorescently labeled cell with fiber-like morphology when embryos were heat shocked at the 2 ss and the 10 ss. Somitic distribution of *HS:tbx16* expressing cells were significantly different from controls at each time point (Mann Whitney U,  $P < 0.05$ ).

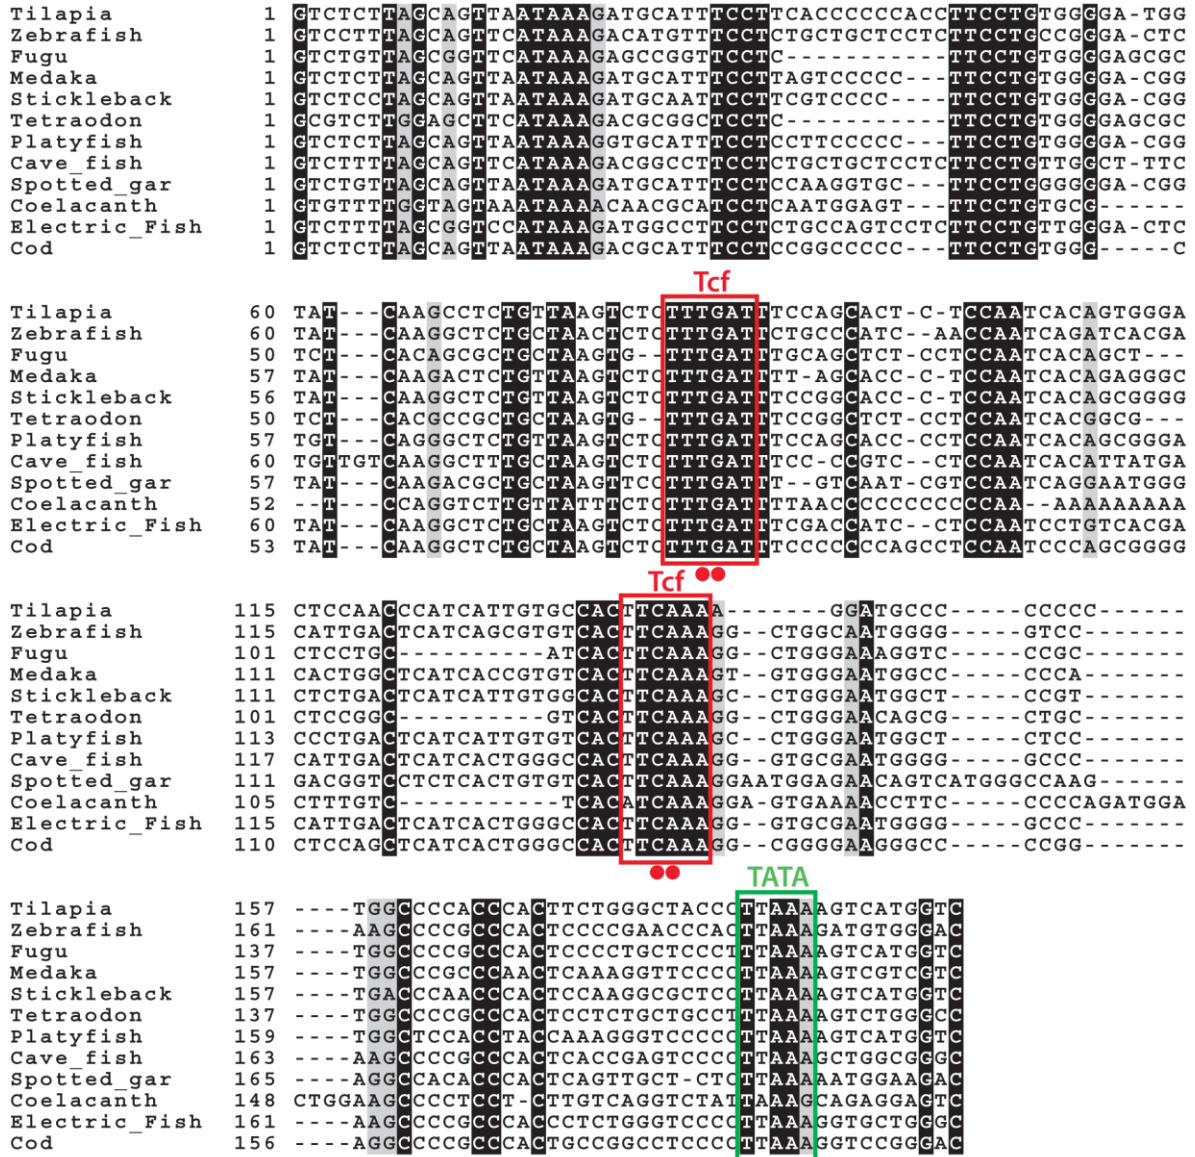

Figure S5. A conserved region in the *tbx16* promoter contains Tcf sites.

A sequence alignment of the *tbx16* promoter from multiple fish species shows a conserved region of approximately 150 bp. Black highlighted bases are completely conserved, and grey highlighted bases are mostly conserved. Two Tcf consensus elements are boxed in red, and a predicted TATA sequence is boxed in green. Below the Tcf sites are dots indicating the bases mutated in zebrafish *tbx16* to make *tbx16-1.ΔTcf*.

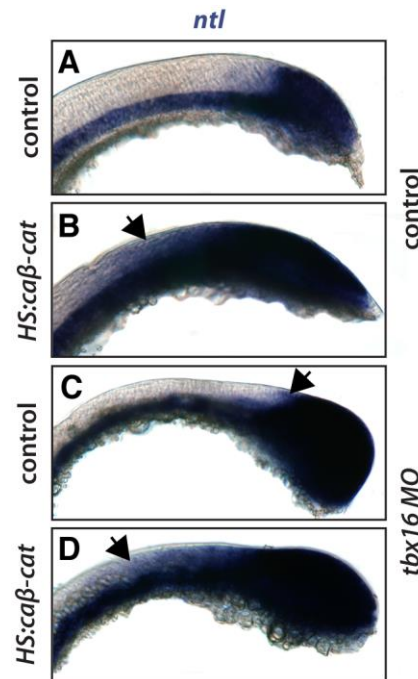

**Figure S6. Wnt signaling regulates *ntl* independently of *tbx16*.**

Expression of *ntl* is expanded in *HS:caβ-catenin* when compared to control embryos (A, B; 17 control and 15 transgenic); with *tbx16 MO*, *ntl* is similarly expanded in *HS:caβ-catenin* when compared to control embryos (C, D; 17 control and 26 transgenic).

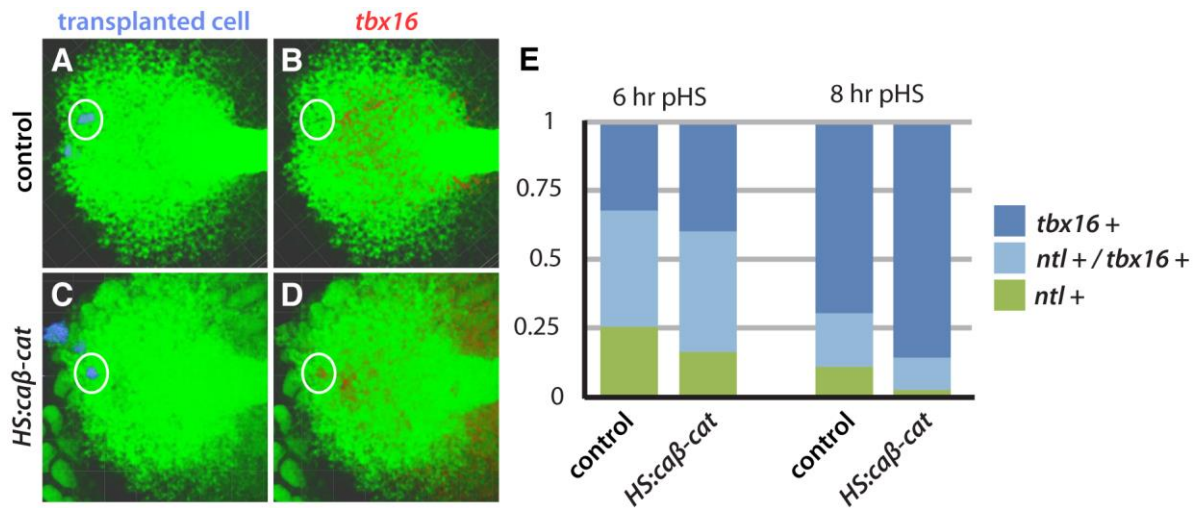

**Figure S7. Transplanted *HS:caβ-catenin* cells activate *tbx16* cell-autonomously.**

(A, C) Transplanted cells in the progenitor population are identified in blue. Cell-autonomous expression of *tbx16* is not apparent in control cells (B) but is apparent in cells with *HS:caβ-catenin* (D). (E) Quantification of all transplanted cells within the tailbud from the same experiment as shown in A-D. At both 6 and 8 hrs post-heat shock, cells expressing *caβ-catenin* were less likely to express *ntl* and more likely to express *tbx16* than control transplanted cells. At 6 hours post-heat shock, 151 cells were analyzed from 16 embryos (control) and 190 cells were scored from 19 embryos (*HS:caβ-catenin*); the distribution of control cells was different from *HS:caβ-catenin* cells (chi-square;  $P=0.052$ ). At 8 hours post-heat shock, 131 cells were analyzed from 15 embryos (control) and 99 cells were scored from 14 embryos (*HS:caβ-catenin*); the distribution of control cells was significantly different from *HS:caβ-catenin* cells (chi-square;  $P<0.01$ ).

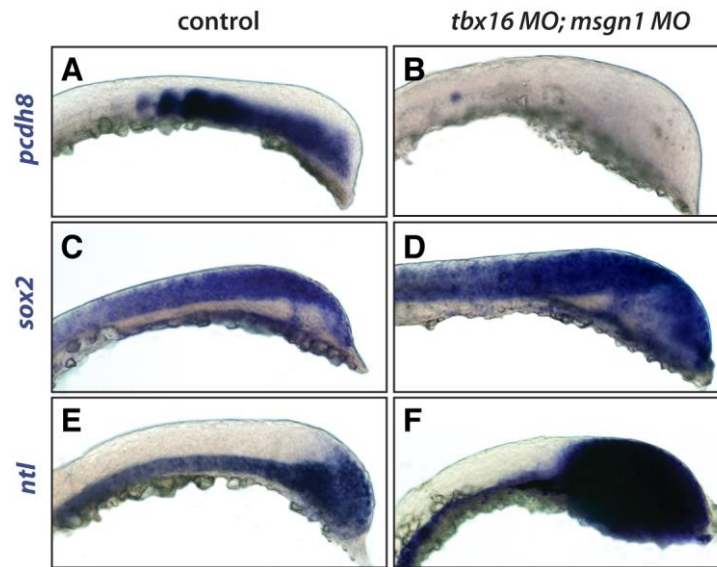

**Figure S8. *sox2* and *ntl* increase when Tbx16 and Msgn1 are depleted.**

Whole mount in situ hybridization shows a decrease in *pcdh8* expression in embryos (A, B; 13 controls and 12 morphants) injected with *tbx16 MO;msgn1 MO* (B). *sox2* expression (C, D; 11 controls and 13 morphants) and *ntl* expression (E, F; 16 controls and 10 morphants) increase in embryos injected with *tbx16 MO;msgn1 MO* (D, F).



Table S1: Summary of the number of embryos analyzed

| Transgene                              | Transcript analyzed                    | # of control embryos |      |      | # of transgenic embryos |      |      |  |
|----------------------------------------|----------------------------------------|----------------------|------|------|-------------------------|------|------|--|
|                                        |                                        | 2 hr                 | 4 hr | 6 hr | 2 hr                    | 4 hr | 6 hr |  |
| <b>HS:tbx16</b>                        | <i>sox2</i>                            | 17                   | 18   | 15   | 19                      | 19   | 21   |  |
|                                        | <i>ntl</i>                             | 22                   | 18   | 20   | 18                      | 22   | 21   |  |
|                                        | <i>bra</i>                             | 17                   | 19   | 25   | 13                      | 14   | 23   |  |
|                                        | <i>msgn1</i>                           | ND<br>(37)           | 16   | 22   | ND<br>(37)              | 16   | 19   |  |
|                                        | <i>tbx6l</i>                           | ND<br>(36)           | 23   | 20   | ND<br>(36)              | 16   | 17   |  |
|                                        | <i>pcdh8</i>                           | 18                   | 18   | 17   | 22                      | 22   | 23   |  |
|                                        | <i>her1</i>                            | 19                   | 24   | 20   | 17                      | 16   | 19   |  |
|                                        | <i>tbx6</i>                            | 21                   | 20   | 22   | 19                      | 19   | 18   |  |
|                                        | <i>mespba</i>                          | 21                   | 25   | 20   | 19                      | 17   | 16   |  |
|                                        | <i>tbx16-UTR</i>                       | 13                   | 18   | 18   | 10                      | 15   | 16   |  |
|                                        | <i>wnt3a</i>                           |                      | 20   |      |                         | 22   |      |  |
|                                        | Tbx16 protein<br>(Immuno Fluor)        | 3                    | 4    | 5    | 5                       | 3    | 3    |  |
|                                        | <b>HS:tbx16-EnR</b>                    | <i>tbx6l</i>         |      | 22   |                         |      | 12   |  |
|                                        |                                        | <i>pcdh8</i>         |      | 22   |                         |      | 16   |  |
|                                        |                                        | <i>her1</i>          |      | 23   |                         |      | 17   |  |
| <i>sox2</i>                            |                                        |                      | 28   |      |                         | 13   |      |  |
| <i>ntl</i>                             |                                        |                      | 30   |      |                         | 16   |      |  |
| <i>wnt3a</i>                           |                                        |                      | 23   |      |                         | 13   |      |  |
| <b>HS:ca<math>\beta</math>-catenin</b> | <i>tbx16/ntl</i><br>(Fluor In Situ)    |                      | 4    |      |                         | 6    |      |  |
|                                        | <i>tbx16-1.2</i>                       |                      |      | 11   |                         |      | 10   |  |
|                                        | <i>tbx16-1.2<math>\Delta</math>TCF</i> |                      |      | 7    |                         |      | 22   |  |
| <b>HS:tbx16</b>                        | <i>cb1045</i><br>(33 hr pHS)           | 15                   |      |      | 6                       |      |      |  |
